# Supplementary material for: A Prospective Observational Study Analyzing the Diagnostic Value of Hepcidin-25 for Anemia in Patients with Inflammatory Bowel Diseases
Source: MDPI journal article supplement (doi:10.3390/ijms25073564), 2024-03-22
Supplement: s1 [file s1]

## **Prospective observational study analyzing diagnostic value of hepcidin-25 of anemia in patients with inflammatory bowel diseases**

Affiliations:

Stanko Petrović, MD, PhD, \*,†, Dino Tarabar, MD, PhD,‡, Danica Ćujić, PhD,§, Dusica Stamenkovic, MD, PhD,\*,¶, Marijana Petrović, MD, PhD,\*, ||, Nemanja Rančić, MD, PhD, \*, \*\*, Vesna Subota, PhD biology, †† Nenad Perišić, MD, PhD,\*, † and Mihailo Bezmarević, MD, PhD,\*, ‡‡

From the

\* Medical Faculty of the Military Medical Academy, University of Defence, Belgrade, Serbia;

†Clinic for Gastroenterology and Hepatology, Military Medical Academy, University of Defense, Belgrade, Serbia;

‡Clinic for Gastroenterology, University Hospital Center “Dr. Dragiša Mišović,” Belgrade, Serbia;

§Laboratory for Biology of Reproduction, Institute for Application of Nuclear Energy, University of Belgrade, Belgrade, Serbia;

¶Department of Anesthesiology and Intensive Care, Military Medical Academy, Belgrade, Serbia;

||Clinic for nephrology, Military Medical Academy, Belgrade, Serbia;

\*\*Centre for Clinical Pharmacology, Military Medical Academy, University of Defense, Belgrade, Serbia;

††Institute of Medical Biochemistry, Military Medical Academy, University of Defense, Belgrade, Serbia;

and

‡‡Department of Hepatobiliary and Pancreatic Surgery, Unit for Perioperative Nutrition, Clinic for General Surgery, Military Medical Academy, University of Defense, 11000 Belgrade, Serbia;

Address correspondence to: Stanko Petrović, MD, PhD, Medical Faculty of the Military Medical Academy, University of Defence, Belgrade, Serbia; Clinic for Gastroenterology and Hepatology, Military Medical Academy, University of Defense, Crnotravska 17, 11 050 Belgrade, Serbia (e-mail: stanko53p@gmail.com, Phone: +381 63 762 2212)

## Contents

|                  |                                                                                                                                                                                               |          |
|------------------|-----------------------------------------------------------------------------------------------------------------------------------------------------------------------------------------------|----------|
| <b>Figure S1</b> | Median values of hepcidin-25 in the Group I and Group II compared to the Control group.                                                                                                       | <b>3</b> |
| <b>Table S1</b>  | Demographic characteristics of study population                                                                                                                                               | <b>4</b> |
| <b>Table S2</b>  | Results of multiplex analysis of cytokines in sera of patients with IBD.<br><br>Significant difference in measured levels between Group I and Group II was observed solely for cytokine IL-13 | <b>5</b> |
| <b>Table S3</b>  | Serum levels of markers of platelet activation in IBD patients.                                                                                                                               | <b>7</b> |

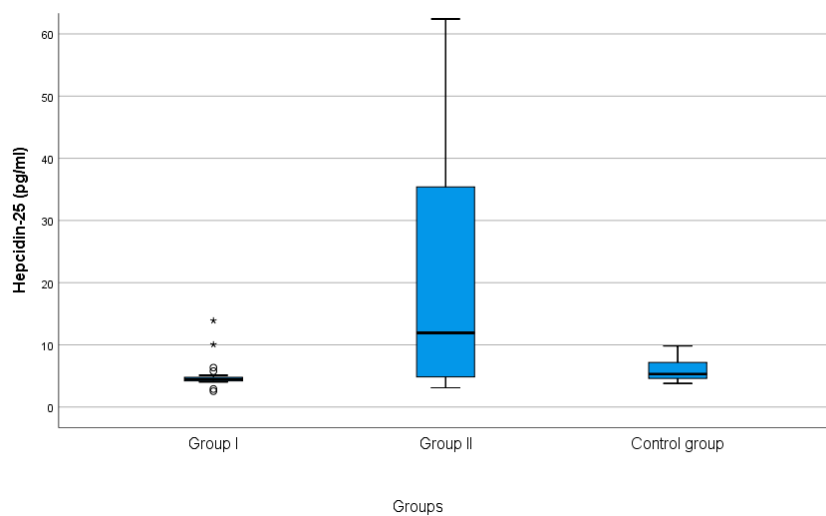

**Figure S1.** Median values of hepcidin-25 in the Group I and Group II compared to the Control group.

**Supplementary Table S1.** Demographic characteristics of study population.

|               | Group I       |               |               | Group II      |               |               | <i>P value</i>         |                |                |
|---------------|---------------|---------------|---------------|---------------|---------------|---------------|------------------------|----------------|----------------|
|               | All<br>(n=30) | UC<br>(n=23)  | CD<br>(n=7)   | All<br>(n=32) | UC<br>(n=26)  | CD<br>(n=6)   | Group I vs<br>Group II | UCI vs<br>UCII | CDI vs<br>CDII |
| Age<br>(year) | 40.6±1<br>2.3 | 42.3±1<br>1.3 | 35.3±1<br>4.8 | 45.0±1<br>3.2 | 45.6±1<br>3.1 | 42.3±1<br>4.7 | 0.181                  | 0.339          | 0.409          |
| Sex<br>(M/F)  | 15/15         | 11/12         | 4/3           | 21/11         | 18/8          | 3/3           | 0.323                  | 0.128          | 1              |

Values are presented as mean(±SD) and n.

Abbreviations: UC I - I group, ulcerative colitis; UC II - II group, ulcerative colitis; CD I - I group, Crohn`s; CD II - II group, Crohn`s; M-male; F-female

**Supplementary Table S2.** Results of multiplex analysis of cytokines in sera of patients with IBD. Significant difference in measured levels between Group I and Group II was observed solely for cytokine IL-13

|                   | Groups and subgroups   |                        |                        |                        |                        |                        | p value                |                  |               |
|-------------------|------------------------|------------------------|------------------------|------------------------|------------------------|------------------------|------------------------|------------------|---------------|
|                   | Group I<br>(n=30)      | UC I<br>(n=23)         | CD I<br>(n=7)          | Group II<br>(n=32)     | UC II<br>(n=26)        | CD II<br>(n=6)         | Group I vs<br>Group II | UC I vs<br>UC II | CD I vs CD II |
| IL-2 (pg/mL)      | 61.0<br>(32.0-85.0)    | 63.0<br>(37.0-94.0)    | 50.0<br>(30.0-82.0)    | 69.0<br>(45.2-109.5)   | 68.5<br>(41.0-93.8)    | 114.0<br>(50.2-286.8)  | 0.215                  | 0.581            | 0.153         |
| IL-4 (pg/mL)      | 0.0<br>(0.0-0.0)       | 0.0<br>(0.0-0.0)       | 0.0<br>(0.0-0.0)       | 0.0<br>(0.0-1.0)       | 0.0<br>(0.0-137.0)     | 0.0<br>(0.0-0.2)       | 0.172                  | 0.288            | 0.28          |
| IL-5 (pg/mL)      | 1.0<br>(0.0-161.8)     | 14.0<br>(0.0-167.0)    | 1.0<br>(0.0-23.0)      | 17.0<br>(0.0-156.5)    | 17.0<br>(0.0-168.2)    | 21.0<br>(0.0-83.8)     | 0.971                  | 0.885            | 0.554         |
| IL-6 (pg/mL)      | 67.0<br>(35.5-128.0)   | 72.0<br>(43.0-131.0)   | 41.0<br>(19.0-106.0)   | 85.0<br>(40.0-229.2)   | 85.0<br>(40.0-181.2)   | 179.0<br>(27.8-325.2)  | 0.494                  | 0.912            | 0.317         |
| IL-9 (pg/mL)      | 100.5<br>(39.8-173.5)  | 86.0<br>(41.0-150.0)   | 163.0<br>(0.0-282.0)   | 170.5<br>(44.7-264.5)  | 170.5<br>(52.2-263.0)  | 129.5<br>(30.0-280.5)  | 0.146                  | 0.076            | 1             |
| IL-10 (pg/mL)     | 104.5<br>(1.0-331.7)   | 194.0<br>(21.0-439.0)  | 1.0<br>(1.0-33.0)      | 129.5<br>(5.2-313.2)   | 100.5<br>(1.0-319.0)   | 224.5<br>(35.2-288.5)  | 1.000                  | 0.356            | 0.084         |
| IL-13 (pg/mL)     | 287.5<br>(97.2-440.2)  | 293.0<br>(125.0-440.0) | 282.0<br>(14.00-441.0) | 132.5<br>(19.0-211.8)  | 132.5<br>(16.0-234.2)  | 100.5<br>(16.5-236.5)  | <b>&lt;0.01</b>        | <b>&lt;0.01</b>  | 0.352         |
| IL-17A<br>(pg/mL) | 83.5<br>(65.0-141.0)   | 87.0<br>(71.0-136.0)   | 65.0<br>(55.0-156.0)   | 102.0<br>(56.0-245.2)  | 92.5<br>(54.0-175.5)   | 261.0<br>(104.2-493.0) | 0.662                  | 0.554            | 0.116         |
| IL-17F<br>(pg/mL) | 3.5<br>(0.0-138.8)     | 14.0<br>(0.0-174.0)    | 0.0<br>(0.0-17.0)      | 6.0<br>(0.0-85.5)      | 3.5<br>(0.0-90.0)      | 13.0<br>(1.0-96.5)     | 0.666                  | 0.916            | 0.168         |
| IL-21 (pg/mL)     | 164.5<br>(153.0-275.2) | 172.0<br>(159.0-288.0) | 159.0<br>(128.0-271.0) | 186.0<br>(144.5-384.2) | 183.0<br>(138.5-288.2) | 361.5<br>(151.5-820.2) | 0.386                  | 0.904            | 0.116         |
| IL-22 (pg/mL)     | 99.0                   | 106.0                  | 69.0                   | 93.0                   | 88.0                   | 218.0                  | 0.714                  | 0.602            | 0.174         |

|                       | (61.8-184.0) | (65.0-193.0)  | (48.0-172.0) | (65.5-259.8)  | (64.8-172.8)  | (53.2-554.8) |       |       |       |
|-----------------------|--------------|---------------|--------------|---------------|---------------|--------------|-------|-------|-------|
| TNF- $\alpha$         | 188.0        | 212.0         | 0.0          | 232.0         | 227.5         | 249.0        | 0.120 | 0.314 | 0.229 |
| (pg/mL)               | (0.0-288.5)  | (169.0-293.0) | (0.0-190.0)  | (170.8-633.0) | (172.2-619.0) | (0.0-676.2)  |       |       |       |
| IFN- $\gamma$ (pg/mL) | 6.0          | 27.0          | 0.0          | 62.5          | 81.0          | 44.5         | 0.274 | 0.573 | 0.186 |
|                       | (0.0-222.8)  | (0.0-252.0)   | (0.0-35.0)   | (0.0-638.5)   | (0.0-561.5)   | (0.0-5468.8) |       |       |       |

Abbreviations: UC I - I group, ulcerative colitis; UC II - II group, ulcerative colitis; CD I - I group, Crohn`s disease; CD II - II group, Crohn`s disease

**Supplementary Table S3.** Serum levels of markers of platelet activation in patients Inflammatory Bowel Disease (IBD)

| Groups and subgroups |                           |                           |                           |                          |                           |                          | p value                |                  |                  |
|----------------------|---------------------------|---------------------------|---------------------------|--------------------------|---------------------------|--------------------------|------------------------|------------------|------------------|
|                      | Group I<br>(n=30)         | UC I<br>(n=23)            | CD I<br>(n=7)             | Group II<br>(n=32)       | UC II<br>(n=26)           | CD II<br>(n=6)           | Group I vs<br>Group II | UC I vs<br>UC II | CD I vs<br>CD II |
| sCD40L<br>(pg/ml)    | 2158.5<br>(1816.7-3277.7) | 2430.0<br>(1841.0-3274.0) | 2078.0<br>(1740.0-3597.0) | 1753.0<br>(975.2-3400.2) | 1961.0<br>(1083.7-3256.7) | 1564.5<br>(716.2-3647.0) | 0.220                  | 0.279            | 0.391            |
| sPsel<br>(ng/ml)     | 115.5<br>(54.2-165.0)     | 96.0<br>(57.0-174.0)      | 142.0<br>(44.0-162.0)     | 60.5<br>(43.5-93.0)      | 59.0<br>(39.5-88.5)       | 109.5<br>(47.2-172.5)    | 0.069                  | <b>0.047</b>     | 0.775            |

UC I - I group, ulcerative colitis; UC II - II group, ulcerative colitis; CD I - I group, Crohn`s disease; CD II - II group, Crohn`s disease
